# Supplementary material for: Structural characterization and immunomodulatory activity of Grifola frondosa polysaccharide via toll-like receptor 4–mitogen-activated protein kinases–nuclear factor κB pathways
Source: Royal Society of Chemistry journal article supplement (doi:10.1039/c6fo00279j), 2016-01-01
Supplement: c6fo00279j1.pdf [file c6fo00279j1.pdf]

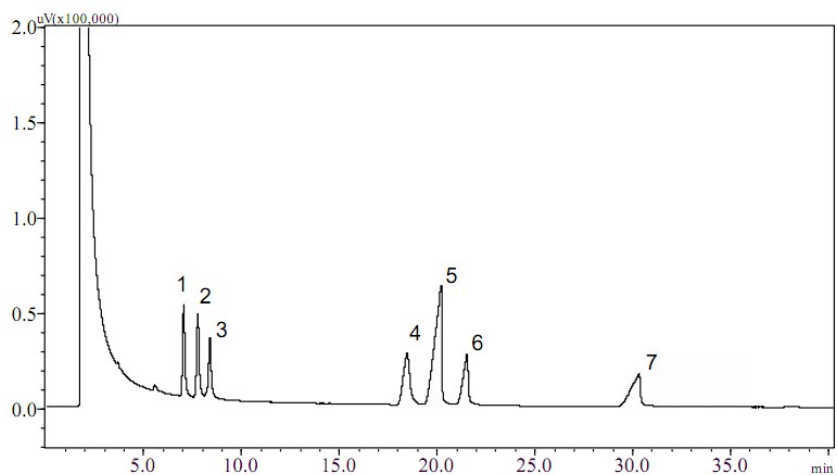

A1. GC spectrum of monosaccharide reference

Note: 1: L-Rhamnose; 2: L-Arabinose; 3: D-Xylose; 4: D-Mannose; 5: D-Glucose; 6: D-Galactose; 7: Inositol

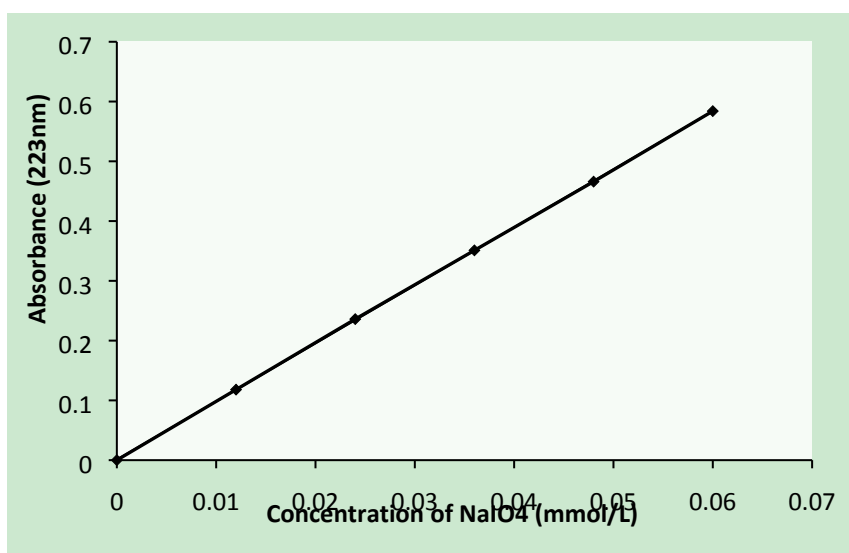

A2. Calibration curve of sodium periodate

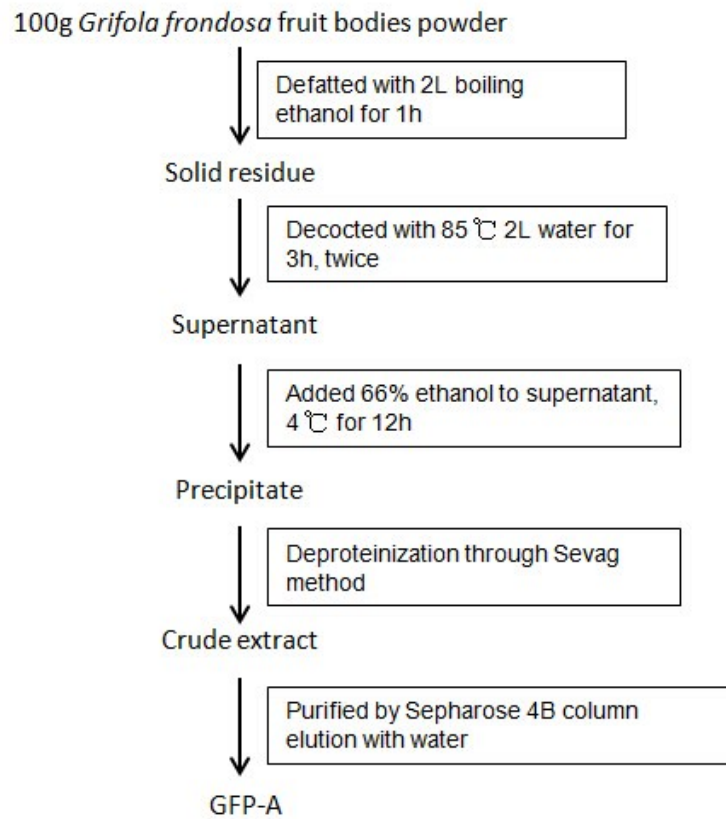

A3. Scheme for extraction of GFP-A
